# Supplementary material for: Self-reported side effects of the Oxford AstraZeneca COVID-19 vaccine among healthcare workers in Ethiopia, Africa: A cross-sectional study
Source: Frontiers journal article supplement (doi:10.3389/fpubh.2022.937794), 2022-07-19
Supplement: Data_Sheet_1.PDF [file Data_Sheet_1.PDF]

# Self-reported Side Effects of COVID-19 Vaccines among Healthcare Workers in Ethiopia, Africa: a cross-sectional study

Supplementary material

Supplementary material 1: Sampling frame

| <b>Region</b> | <b>Total number of health professionals</b> | <b>Number selected</b> |
|---------------|---------------------------------------------|------------------------|
| Oromia        | 54406                                       | 149                    |
| Amhara        | 40375                                       | 45                     |
| Somali        | 9982                                        | 32                     |
| Southwest     | 7694                                        | 120                    |

## Supplementary material 2: Tool

| 1. Demographic Data                                                         |                                                                                                                                                                                                                                                                                                                                                      |
|-----------------------------------------------------------------------------|------------------------------------------------------------------------------------------------------------------------------------------------------------------------------------------------------------------------------------------------------------------------------------------------------------------------------------------------------|
| 1.1 Gender                                                                  | 1.Female<br>2.Male<br>3.Prefer not to say                                                                                                                                                                                                                                                                                                            |
| 1.2 Age(18-99)                                                              |                                                                                                                                                                                                                                                                                                                                                      |
| 1.3 Profession                                                              | 1.Physician (M.D.)<br>2.Dentist (D.D.S)<br>3.Nurse (R.N.)<br>4.MIDWIFE<br>5.Pharmacist (PharmD)<br>6.Physiotherapist<br>7.Other (please specify)                                                                                                                                                                                                     |
| <b>1.4 COUNTRY</b>                                                          | <ul style="list-style-type: none"> <li>ETHIOPIA</li> </ul>                                                                                                                                                                                                                                                                                           |
| 1.5.Region                                                                  | 1.AMHARA<br>2.ROMIA<br>3.SOMALI<br>4.SOUTHWEST                                                                                                                                                                                                                                                                                                       |
| 1.6.Weight(kg)                                                              |                                                                                                                                                                                                                                                                                                                                                      |
| 1.7.Height(meter)                                                           |                                                                                                                                                                                                                                                                                                                                                      |
| 2. Medical Anamnesis                                                        |                                                                                                                                                                                                                                                                                                                                                      |
| 2.1 Do you have any chronic disease?                                        | 1.Yes<br>0.No                                                                                                                                                                                                                                                                                                                                        |
| 2.2 If "Yes", please specify all chronic diseases you suffer from currently | 1.Allergy<br>2.Asthma<br>3.Blood Disease<br>4.Bowel Disease<br>5.Cancer<br>6.Cardiac Disease<br>7.Chronic Hypertension<br>8.COPD<br>9.Diabetes Mellitus – I<br>10.Diabetes Mellitus – II<br>11.Hepatologic Disease<br>12.Psychological Distress<br>13.Neurologic Disease<br>14.Ophthalmologic Disease<br>15.Renal Disease<br>16.Rheumatoid Arthritis |

|                                                                   |                                                                                                                                                                                                                                                                                                                                                                                                                                                                 |
|-------------------------------------------------------------------|-----------------------------------------------------------------------------------------------------------------------------------------------------------------------------------------------------------------------------------------------------------------------------------------------------------------------------------------------------------------------------------------------------------------------------------------------------------------|
|                                                                   | 17.Thyroid Disease<br>18.Other, please specify                                                                                                                                                                                                                                                                                                                                                                                                                  |
| 2.3 Do you take any medication currently?                         | 1.Yes<br>0.No                                                                                                                                                                                                                                                                                                                                                                                                                                                   |
| 2.4 If "Yes", please specify the category of the drug             | 1.Anti-asthma<br>2.Antibiotics<br>3.Anticoagulant<br>4.Antidepressant<br>5.Antidiabetic<br>6.Antiepileptic<br>7.Antihistamine<br>8.Antihypertensive<br>9.Anti-Reflux<br>10.Anti-venous Insufficiency<br>11.Immunosuppressive<br>12.Cholesterol-lowering<br>13.Common Analgesic<br>14.Contraceptive<br>15.Corticosteroid<br>16.NSAID<br>17.Opioid Analgesic<br>18.Thyroid Hormones<br>19.Other, please specify (the generic name or the market name of the drug) |
| 2.5 Do you smoke cigarettes?                                      | 1.Yes<br>0.No                                                                                                                                                                                                                                                                                                                                                                                                                                                   |
| 2.6 If "Yes", how many cigarettes do you smoke per day?           |                                                                                                                                                                                                                                                                                                                                                                                                                                                                 |
| 2.7 Do you drink alcohol?                                         | 1.Yes<br>0.No                                                                                                                                                                                                                                                                                                                                                                                                                                                   |
| 2.8 If "Yes", how many glasses of (0.5 l) beer per week?          |                                                                                                                                                                                                                                                                                                                                                                                                                                                                 |
| 2.9. If "Yes", how many glasses of (0.2 l) Wine per week?         |                                                                                                                                                                                                                                                                                                                                                                                                                                                                 |
| 2.10 If "Yes", how many glasses of (0.04 l) Spirit per week?      |                                                                                                                                                                                                                                                                                                                                                                                                                                                                 |
| 2.11 Were you pregnant during vaccination?(only for female)       | 1.Yes<br>0.no                                                                                                                                                                                                                                                                                                                                                                                                                                                   |
| 2.12 Were you breast feeding during vaccination?(only for female) | 1.Yes<br>0.no                                                                                                                                                                                                                                                                                                                                                                                                                                                   |

### 3. COVID-19-relate

|                                                                                |                                                                                                                                                                                                                                                                                                                                                                                                                                                                                                                                                                                                                                                                                                                                                                                                                                                                                                                                                                                                                                                                                                                                                                                                                                                                                                                                   |
|--------------------------------------------------------------------------------|-----------------------------------------------------------------------------------------------------------------------------------------------------------------------------------------------------------------------------------------------------------------------------------------------------------------------------------------------------------------------------------------------------------------------------------------------------------------------------------------------------------------------------------------------------------------------------------------------------------------------------------------------------------------------------------------------------------------------------------------------------------------------------------------------------------------------------------------------------------------------------------------------------------------------------------------------------------------------------------------------------------------------------------------------------------------------------------------------------------------------------------------------------------------------------------------------------------------------------------------------------------------------------------------------------------------------------------|
| 3.1 Vaccine Type                                                               | <ol style="list-style-type: none"> <li>1. Oxford–AstraZeneca COVID-19 Vaccine (covishield)</li> <li>2. Pfizer-BioNTech COVID-19 Vaccine</li> <li>3. Moderna COVID-19 Vaccine</li> <li>4. Janssen Vaccine</li> <li>5. Sputnik V Vaccine</li> <li>6. synovax</li> <li>7. Covaxin Vaccine</li> <li>8. Other, please specify</li> </ol>                                                                                                                                                                                                                                                                                                                                                                                                                                                                                                                                                                                                                                                                                                                                                                                                                                                                                                                                                                                               |
| 3.2 Vaccination Date (first dose)                                              |                                                                                                                                                                                                                                                                                                                                                                                                                                                                                                                                                                                                                                                                                                                                                                                                                                                                                                                                                                                                                                                                                                                                                                                                                                                                                                                                   |
| 3.3 Have you taken the second dose?                                            | <ol style="list-style-type: none"> <li>1. Yes</li> <li>0. No</li> </ol>                                                                                                                                                                                                                                                                                                                                                                                                                                                                                                                                                                                                                                                                                                                                                                                                                                                                                                                                                                                                                                                                                                                                                                                                                                                           |
| 3.4 Vaccination Date (second dose)                                             |                                                                                                                                                                                                                                                                                                                                                                                                                                                                                                                                                                                                                                                                                                                                                                                                                                                                                                                                                                                                                                                                                                                                                                                                                                                                                                                                   |
| 3.5 Have you ever been diagnosed with COVID-19?                                | <ol style="list-style-type: none"> <li>1. Yes</li> <li>0. No</li> </ol>                                                                                                                                                                                                                                                                                                                                                                                                                                                                                                                                                                                                                                                                                                                                                                                                                                                                                                                                                                                                                                                                                                                                                                                                                                                           |
| 3.6 If "Yes", when were you diagnosed?                                         | <ol style="list-style-type: none"> <li>1. Before vaccination</li> <li>2. Between 1st and 2nd dose of vaccine</li> <li>3. After second dose</li> </ol>                                                                                                                                                                                                                                                                                                                                                                                                                                                                                                                                                                                                                                                                                                                                                                                                                                                                                                                                                                                                                                                                                                                                                                             |
| 3.7. Please specify the date when you were diagnosed                           |                                                                                                                                                                                                                                                                                                                                                                                                                                                                                                                                                                                                                                                                                                                                                                                                                                                                                                                                                                                                                                                                                                                                                                                                                                                                                                                                   |
| 3.8 How do you describe the severity of your COVID-19 infection?               | <ol style="list-style-type: none"> <li>1. <b>Mild</b> (no symptoms, or mild upper respiratory tract symptoms, or cough, new myalgia, or asthenia without new shortness of breath or a reduction in oxygen saturation)</li> <li>2. <b>Moderate</b> (prostration, severe asthenia, fever <math>&gt; 38^{\circ}\text{C}</math> or persistent cough clinical or radiological signs of lung involvement no clinical or laboratory indicators of clinical severity or respiratory impairment)</li> <li>3. <b>Severe</b> (respiratory rate <math>\geq 30</math> breaths/min, or oxygen saturation <math>\leq 92\%</math> at a rest state, or arterial partial pressure of oxygen (<math>\text{PaO}_2</math>)/ inspired oxygen fraction (<math>\text{FiO}_2</math>) <math>\leq 300</math>)</li> <li>4. <b>Critical</b> (Respiratory failure Occurrence of severe respiratory failure (<math>\text{PaO}_2/\text{FiO}_2 &lt; 200</math>), respiratory distress or acute respiratory distress syndrome (ARDS). This includes patients deteriorating despite advanced forms of respiratory support (non-invasive ventilation (NIV), high-flow nasal oxygen (HFNO)) OR patients requiring mechanical ventilation. OR other signs of significant deterioration hypotension or shock impairment of consciousness other organ failure)</li> </ol> |
| 3.9 What were the symptoms you have experienced during the COVID-19 infection? | <ol style="list-style-type: none"> <li>1. Fever or chills</li> <li>2. Cough</li> <li>3. Shortness of breath or difficulty breathing</li> <li>4. Fatigue</li> <li>5. Muscle or body aches</li> <li>6. Headache</li> <li>7. New loss of taste or smell</li> <li>8. Sore throat</li> <li>9. Congestion or runny nose</li> </ol>                                                                                                                                                                                                                                                                                                                                                                                                                                                                                                                                                                                                                                                                                                                                                                                                                                                                                                                                                                                                      |

|                                                                                                                  |                                                                                                                                                                                                                                                                                        |
|------------------------------------------------------------------------------------------------------------------|----------------------------------------------------------------------------------------------------------------------------------------------------------------------------------------------------------------------------------------------------------------------------------------|
|                                                                                                                  | 10. Nausea or vomiting<br>11. Diarrhea<br>12. Other (please specify)                                                                                                                                                                                                                   |
| 3.10 For how many days did you experience the COVID-19 symptoms?                                                 |                                                                                                                                                                                                                                                                                        |
| 3.11 If not diagnosed with covid 19, did you ever have the symptoms of covid 19?                                 | 1.Yes<br>• 0. no                                                                                                                                                                                                                                                                       |
| 3.12 If yes, What were the symptoms you have experienced?                                                        | 1.Fever or chills<br>2.Cough<br>3.Shortness of breath or difficulty breathing<br>4.Fatigue<br>5.Muscle or body aches<br>6.Headache<br>7.New loss of taste or smell<br>8.Sore throat<br>9.Congestion or runny nose<br>10.Nausea or vomiting<br>11.Diarrhea<br>12.Other (please specify) |
| 3.14 For how many days did you experience the COVID-19 symptoms?                                                 |                                                                                                                                                                                                                                                                                        |
| 3.15 Have you ever tested for antibody of covid 19?                                                              | 1.Yes<br>0.no                                                                                                                                                                                                                                                                          |
| 3.16 If yes, what was the result?                                                                                | 1.Positive<br>2.negative                                                                                                                                                                                                                                                               |
| <b>4. Vaccine Side Effects</b>                                                                                   |                                                                                                                                                                                                                                                                                        |
| 4.1. Within four weeks of receiving the vaccine, have you suffered from any of the following local side effects? | 1. Injection site pain<br>2. Injection site swelling<br>3. Injection site redness<br>4. Other, please specify                                                                                                                                                                          |
| 4.2. When did the local side effects emerge?                                                                     | 1. After the first dose only<br>2. After the second dose only<br>3. After both doses                                                                                                                                                                                                   |
| 4.3 If you chose any of the previous side effects, please                                                        | 1. 1 day<br>2. 2 days                                                                                                                                                                                                                                                                  |

|                                                                                                            |                                                                                                                                                                                                                                                                                                                                                                                                                         |
|------------------------------------------------------------------------------------------------------------|-------------------------------------------------------------------------------------------------------------------------------------------------------------------------------------------------------------------------------------------------------------------------------------------------------------------------------------------------------------------------------------------------------------------------|
| indicate their duration                                                                                    | 3. 3 days<br>4. 5 days<br>5. 1 week<br>6. 2 weeks<br>7. 3 weeks<br>8. 4 weeks<br>9. > 1 month                                                                                                                                                                                                                                                                                                                           |
| 4.4. Within four weeks of receiving the vaccine, have you suffered from any of the following side effects? | 0. None<br>1. Fatigue<br>2. Headache<br>3. Muscle Pain<br>4. Joint Pain<br>5. Fever<br>6. Chills<br>7. Nausea<br>8. Diarrhoea<br>9. Shortness of breath<br>10. Anaphylaxis<br>11. Swollen lymph nodes<br>12. Mouth tingling<br>13. Loss of taste<br>14. Change of taste<br>15. Halitosis (Oral malodour)<br>16. Oral ulcers / blisters / vesicles<br>17. Bleeding gingiva<br>18. Skin rash<br>19. Other, please specify |
| <b>4.5.</b> When did the systemic side effects emerge?                                                     | 1. After the first dose only<br>2. After the second dose only<br>3. After both doses                                                                                                                                                                                                                                                                                                                                    |
| <b>4.6.</b> If you chose any of the previous side effects, please indicate their duration                  | 1. 1 day<br>2. 2 days<br>3. 3 days<br>4. 5 days<br>5. 1 week<br>6. 2 weeks<br>7. 3 weeks<br>8. 4 weeks<br>9. > 1 month                                                                                                                                                                                                                                                                                                  |
| <b>4.7</b> Have you taken any medications to relieve your side effects?                                    | 1. Yes<br>0. No                                                                                                                                                                                                                                                                                                                                                                                                         |
| 4.8 If “Yes”, please specify what drug you have used. Use either generic name or market name               |                                                                                                                                                                                                                                                                                                                                                                                                                         |

|                                                                                                                                                                                           |               |
|-------------------------------------------------------------------------------------------------------------------------------------------------------------------------------------------|---------------|
| 4.9 Was it before or after vaccination?                                                                                                                                                   |               |
| <b>4.10</b> Do you agree to participate in the longitudinal study evaluating the safety of the vaccines from a long term perspective?                                                     | 1.Yes<br>0.No |
| 4.11. If yes, give us please your contact e-mail address. Your e-mail address will be automatically stored and removed from the survey so the data you have shared will remain anonymous. |               |
